# Supplementary material
Source: PubMed Central journal article supplement (PMC3203654)
Supplement: cr201117x1.pdf [file cr201117x1.pdf]

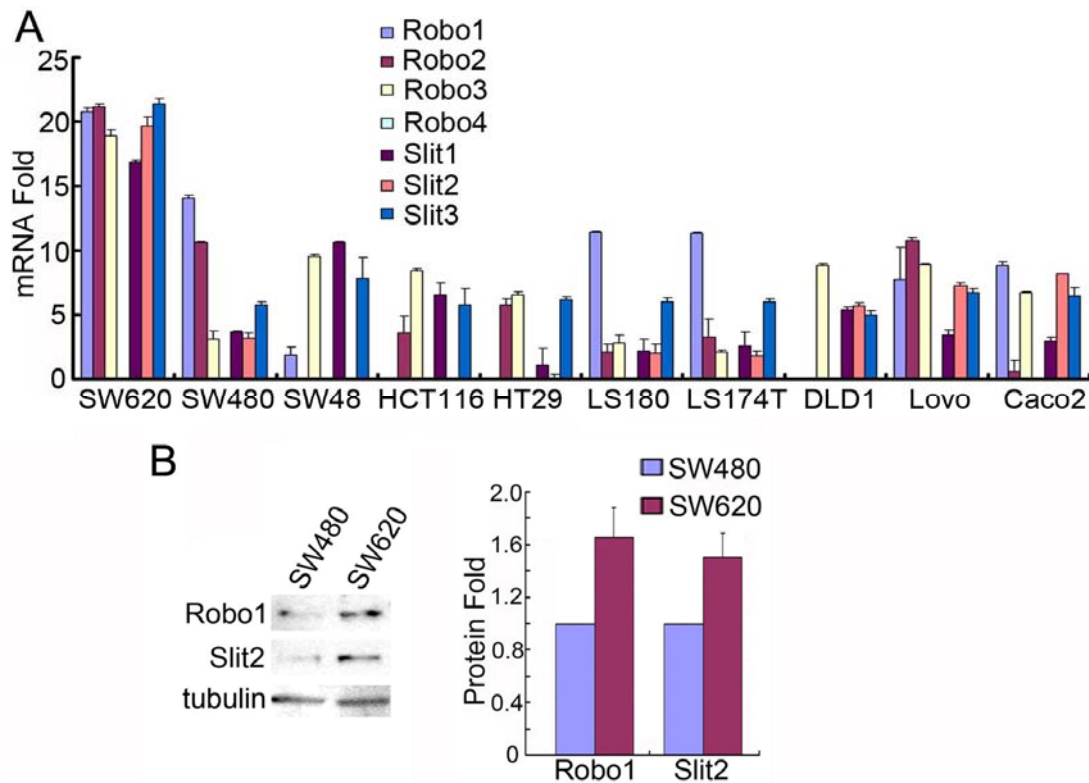

**Supplementary information, Figure S1** Expression of Slit and Robo mRNAs and proteins in human colorectal carcinoma cell lines.

(A) Human colorectal carcinoma cell lines were cultured according to the recommendations of ATCC. Total RNA was extracted, reverse transcribed, PCR amplified and normalized to an endogenous  $\beta$ -actin control. Results represent the mean  $\pm$  S.D. of three independent experiments. (B) Lysates of SW480 cells (primary colorectal adenocarcinoma) and SW620 cells (metastatic lymph node of colorectal adenocarcinoma) were lysed and directly immunoblotted by mAbs to Robo1, Slit2 and  $\alpha$ -tubulin, respectively. Immunoblotting signals were quantified by densitometry analysis. Results represent at least three separate experiments (left panel) or the mean  $\pm$  S.D. of three independent experiments (right panel).
