# Supplementary material
Source: PubMed Central journal article supplement (PMC3203654)
Supplement: cr201117x3.pdf [file cr201117x3.pdf]

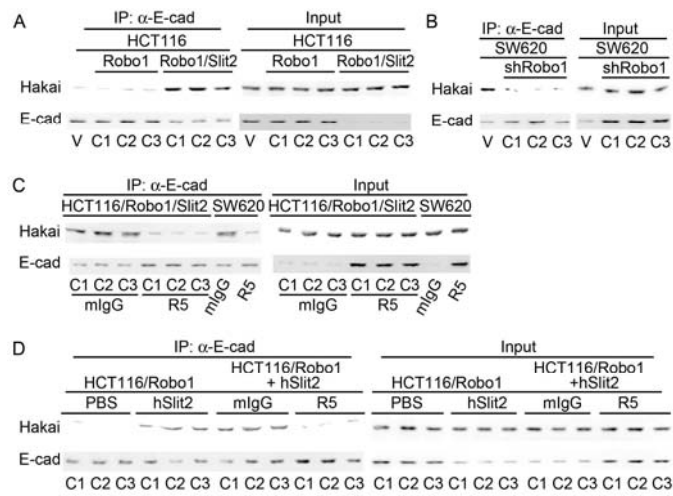

**Supplementary information, Figure S3** Effects of Slit2 and Robo1 expression on recruitment of Hakai to E-cadherin.

Hakai binding to E-cadherin in HCT116/V, HCT116/Robo1, HCT116/Robo1/Slit2, SW620/V and SW620/shRobo1 cells in the absence or presence of mIgG, R5, PBS and hSlit2. E-cadherin was immunoprecipitated from the cell lysates followed by immunoblotting with the Abs to E-cadherin (BD Biosciences) and Hakai (Abcam). Results are representative of at least three separate experiments.
