# Supplementary material
Source: PubMed Central journal article supplement (PMC3203654)
Supplement: cr201117x4.pdf [file cr201117x4.pdf]

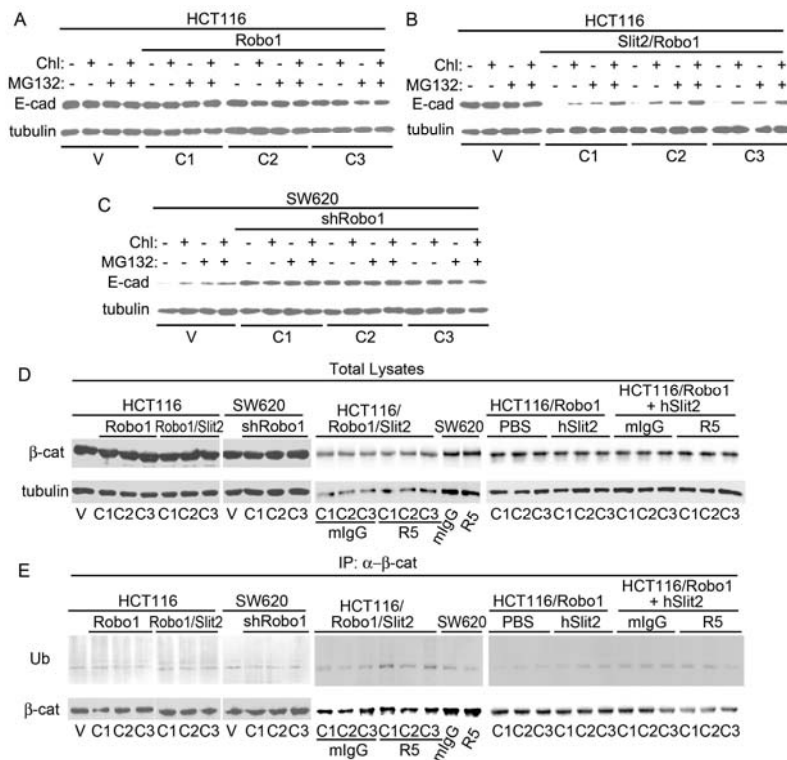

**Supplementary information, Figure S4** Slit2-Robo1-mediated degradation of E-cadherin, but not β-catenin, is repressed by chloroquin and MG132.

(A-C) Effects of chloroquin and MG132 on E-cadherin degradation. E-cadherin expression in HCT116V and HCT116/Robo1 cells (A), HCT116/V and HCT116/Robo1/Slit2 cells (B) or SW620/shRobo1 cells (C) was determined by immunoblotting with the E-cadherin and α-tubulin mAbs in the absence or presence of chloroquin, MG132 or chloroquin plus MG132. (D) Slit-Robo signaling fails to induce β-catenin degradation. Expression of β-catenin in HCT116V, HCT116/Robo1 and HCT116/Robo1/Slit2 cells or SW620, SW620/V and SW620/shRobo1 cells, in the absence or presence of mIgG, R5, PBS or hSlit2, was determined by immunoblotting for β-catenin (upper panels) and α-tubulin (lower panels). (E) Slit-Robo signaling fails to induce β-catenin ubiquitination. Ubiquitination of β-catenin immunoprecipitated from HCT116V, HCT116/Robo1 and HCT116/Robo1/Slit2 cells or SW620, SW620/V and SW620/shRobo1 cells, in the absence or presence of mIgG, R5, PBS or hSlit2, was determined by immunoblotting for ubiquitin (upper panels) and β-catenin (lower panels). Results are representative of at least three separate experiments.
