# Supplementary material
Source: PubMed Central journal article supplement (PMC3203654)
Supplement: cr201117x5.pdf [file cr201117x5.pdf]

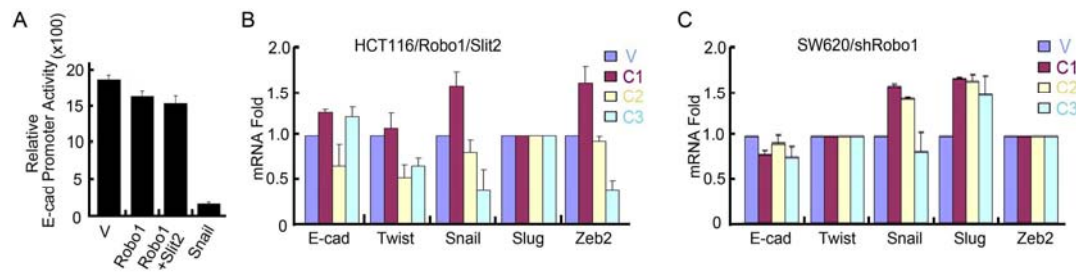

**Supplementary information, Figure S5** Effects of Slit-Robo signaling on transcription regulation of E-cadherin and its repressors.

(A) Effect of Slit2 and Robo1 expression on E-cadherin promoter activity. HCT116 cells were co-transfected with the plasmid encoding the E-cadherin promoter luciferase reporter, the plasmid carrying the  $\beta$ -galactosidase gene, and plain vector or plasmids encoding Robo1, Robo1 plus Slit2 or snail. Luciferase activity was determined in cell lysates and normalized with  $\beta$ -galactosidase activity.

(B-C) Effect of Slit2 and Robo1 expression on E-cadherin, Twist, Snail, Slug and Zeb2 mRNAs. Total RNAs were extracted from HCT116/V and HCT116/Robo1/Slit2 cells or SW620/V and SW620/shRobo1 cells and reverse transcribed for PCR amplification and normalization using an endogenous  $\beta$ -actin control. Results represent the mean  $\pm$  S.D. of three independent experiments.
